# Supplementary material for: Modelling aromatisation of (BN)nH2n azabora-annulenes
Source: Royal Society of Chemistry journal article supplement (doi:10.1039/d0cp02284e), 2020-01-01

### Electronic Supplementary Information

The planarised cyclooctatetraene neutral, the borazocine neutral and dianion monocycles were optimised with maximal symmetry ( $D_{4h}$  point group). The optimisation and frequency calculations were run on Gaussian 09 using B3LYP/6-31G\*\*. The symmetry and charge of other azabore-annulenes are included, with imaginary frequencies. Finally, the  $(B_4N_4H_8)_2Ti$  sandwich complex coordinates are given, alongside visual depiction of the six lowest energy active modes, calculated using MP2/6-31G\*\* with QChem 5.2. Finally, the wB97X-2/6-31G\*\* calculations were repeated for the  $(B_4N_4H_8)_2Ti$  sandwich complex and the same structural information is given in full, these calculations were also carried out using QChem 5.2.

#### $D_{4h}$ Borazocine Neutral Optimised

|   |           |           |          |
|---|-----------|-----------|----------|
| H | 0.000000  | 3.106123  | 0.000000 |
| H | -2.008126 | 2.008126  | 0.000000 |
| H | -3.106123 | 0.000000  | 0.000000 |
| H | 2.008126  | 2.008126  | 0.000000 |
| H | 3.106123  | 0.000000  | 0.000000 |
| H | 0.000000  | -3.106123 | 0.000000 |
| H | 2.008126  | -2.008126 | 0.000000 |
| H | -2.008126 | -2.008126 | 0.000000 |
| B | 0.000000  | 1.906398  | 0.000000 |
| B | -1.906398 | 0.000000  | 0.000000 |
| B | 0.000000  | -1.906398 | 0.000000 |
| B | 1.906398  | 0.000000  | 0.000000 |
| N | 1.291967  | 1.291967  | 0.000000 |
| N | -1.291967 | 1.291967  | 0.000000 |
| N | -1.291967 | -1.291967 | 0.000000 |
| N | 1.291967  | -1.291967 | 0.000000 |

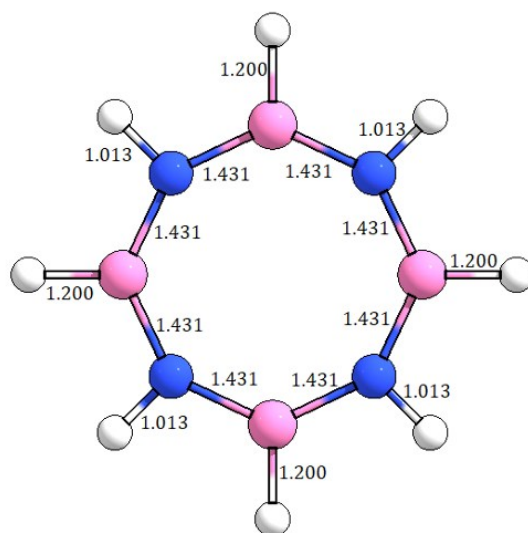

#### $D_{4h}$ Borazocine Dianion Optimised

|   |           |           |          |
|---|-----------|-----------|----------|
| H | 0.000000  | 3.179802  | 0.000000 |
| H | -2.017268 | 2.017268  | 0.000000 |
| H | -3.179802 | 0.000000  | 0.000000 |
| H | 2.017268  | 2.017268  | 0.000000 |
| H | 3.179802  | 0.000000  | 0.000000 |
| H | 0.000000  | -3.179802 | 0.000000 |
| H | 2.017268  | -2.017268 | 0.000000 |
| H | -2.017268 | -2.017268 | 0.000000 |
| B | 0.000000  | 1.946860  | 0.000000 |
| B | -1.946860 | 0.000000  | 0.000000 |
| B | 0.000000  | -1.946860 | 0.000000 |
| B | 1.946860  | 0.000000  | 0.000000 |
| N | 1.300130  | 1.300130  | 0.000000 |
| N | -1.300130 | 1.300130  | 0.000000 |
| N | -1.300130 | -1.300130 | 0.000000 |
| N | 1.300130  | -1.300130 | 0.000000 |

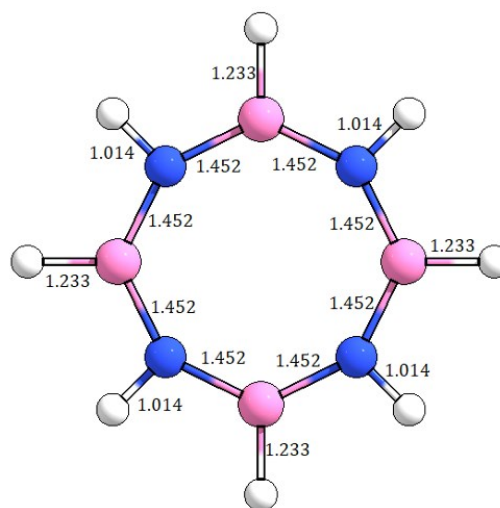

#### $D_{4h}$ Cyclooctatetraene (COT) Neutral Optimised

|   |           |          |          |
|---|-----------|----------|----------|
| C | 0.672713  | 1.716417 | 0.000000 |
| C | -0.672713 | 1.716417 | 0.000000 |

|   |           |           |          |
|---|-----------|-----------|----------|
| C | -1.716417 | 0.672713  | 0.000000 |
| C | 1.716417  | 0.672713  | 0.000000 |
| C | -1.716417 | -0.672713 | 0.000000 |
| C | 1.716417  | -0.672713 | 0.000000 |
| C | 0.672713  | -1.716417 | 0.000000 |
| H | 1.111484  | 2.712952  | 0.000000 |
| H | -1.111484 | 2.712952  | 0.000000 |
| H | -2.712952 | 1.111484  | 0.000000 |
| H | 2.712952  | 1.111484  | 0.000000 |
| H | 2.712952  | -1.111484 | 0.000000 |
| C | -0.672713 | -1.716417 | 0.000000 |
| H | -1.111484 | -2.712952 | 0.000000 |
| H | 1.111484  | -2.712952 | 0.000000 |
| H | -2.712952 | -1.111484 | 0.000000 |

### $D_{2h}$ $B_2N_2H_4$ Neutral Optimised

|   |           |           |           |
|---|-----------|-----------|-----------|
| H | -0.000000 | -2.170869 | -0.000000 |
| H | 0.000000  | 2.170869  | 0.000000  |
| B | 0.000000  | 0.979129  | -0.000000 |
| B | -0.000000 | -0.979129 | -0.000000 |
| N | -1.070374 | 0.000000  | -0.000000 |
| N | 1.070374  | -0.000000 | -0.000000 |
| H | 2.071439  | -0.000000 | -0.000000 |
| H | -2.071439 | 0.000000  | 0.000000  |

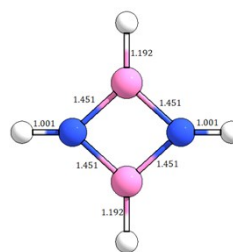

Imaginary frequencies: 214.3i  $\text{cm}^{-1}$  ( $B_{3u}$ ), 61.06i  $\text{cm}^{-1}$  ( $B_{2g}$ )

### $D_{2h}$ $B_2N_2H_4$ Cation Optimised

|   |           |           |           |
|---|-----------|-----------|-----------|
| H | 0.000000  | -2.278754 | -0.000000 |
| H | -0.000000 | 2.278754  | 0.000000  |
| B | -0.000000 | 1.104612  | -0.000000 |
| B | 0.000000  | -1.104612 | -0.000000 |
| N | -1.027525 | -0.000000 | -0.000000 |
| N | 1.027525  | 0.000000  | -0.000000 |
| H | 2.073867  | 0.000000  | -0.000000 |
| H | -2.073867 | -0.000000 | 0.000000  |

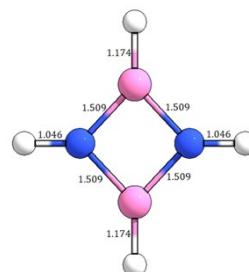

Imaginary frequencies: 377.2i  $\text{cm}^{-1}$  ( $B_{3u}$ )

### $D_{2h}$ $B_2N_2H_4$ Anion Optimised

|   |           |           |           |
|---|-----------|-----------|-----------|
| H | 0.000000  | -2.310983 | -0.000000 |
| H | -0.000000 | 2.310983  | 0.000000  |
| B | -0.000000 | 1.084281  | -0.000000 |
| B | 0.000000  | -1.084281 | -0.000000 |
| N | -1.052779 | -0.000000 | -0.000000 |
| N | 1.052779  | 0.000000  | -0.000000 |
| H | 2.066227  | 0.000000  | -0.000000 |
| H | -2.066227 | -0.000000 | 0.000000  |

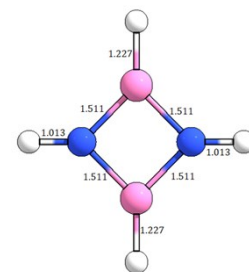

Imaginary frequencies: 1050i  $\text{cm}^{-1}$  ( $B_{1g}$ ), 866.3  $\text{cm}^{-1}$  ( $B_{3u}$ ),  
631.6  $\text{cm}^{-1}$  ( $B_{2g}$ )

### $D_{3h}$ $B_3N_3H_6$ Neutral Optimised

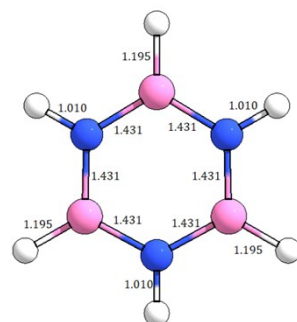

|   |             |             |            |
|---|-------------|-------------|------------|
| H | -2.64589324 | 0.00000000  | 0.00000000 |
| H | 1.32294662  | -2.29141077 | 0.00000000 |
| H | 1.32294662  | 2.29141077  | 0.00000000 |
| N | 1.40941708  | 0.00000000  | 0.00000000 |
| N | -0.70470854 | 1.22059099  | 0.00000000 |
| N | -0.70470854 | -1.22059099 | 0.00000000 |
| B | 0.72534573  | 1.25633566  | 0.00000000 |
| B | -1.45069147 | 0.00000000  | 0.00000000 |
| B | 0.72534573  | -1.25633566 | 0.00000000 |
| H | 2.41908988  | 0.00000000  | 0.00000000 |
| H | -1.20954494 | -2.09499329 | 0.00000000 |
| H | -1.20954494 | 2.09499329  | 0.00000000 |

### $D_{5h}$ $B_5N_5H_{10}$ Neutral Optimised

|   |           |           |           |
|---|-----------|-----------|-----------|
| B | -1.390558 | -1.913939 | -0.000000 |
| B | 1.390558  | -1.913939 | -0.000000 |
| B | 2.249971  | 0.731060  | 0.000000  |
| B | -0.000000 | 2.365759  | 0.000000  |
| B | -2.249971 | 0.731060  | 0.000000  |
| N | -2.145089 | -0.696982 | 0.000000  |
| N | 0.000000  | -2.255480 | -0.000000 |
| N | 2.145089  | -0.696982 | -0.000000 |
| N | 1.325738  | 1.824722  | 0.000000  |
| N | -1.325738 | 1.824722  | 0.000000  |
| H | -0.000000 | 3.569521  | 0.000000  |
| H | -3.394816 | 1.103043  | 0.000000  |
| H | -3.109856 | -1.010453 | 0.000000  |
| H | -2.098112 | -2.887803 | -0.000000 |
| H | 0.000000  | -3.269896 | -0.000000 |
| H | -1.921997 | 2.645401  | 0.000000  |
| H | 2.098112  | -2.887803 | -0.000000 |
| H | 1.921997  | 2.645401  | 0.000000  |
| H | 3.109856  | -1.010453 | -0.000000 |
| H | 3.394816  | 1.103043  | 0.000000  |

Imaginary frequencies:  $77.27i$   $cm^{-1}$ ,  $77.27i$   $cm^{-1}$

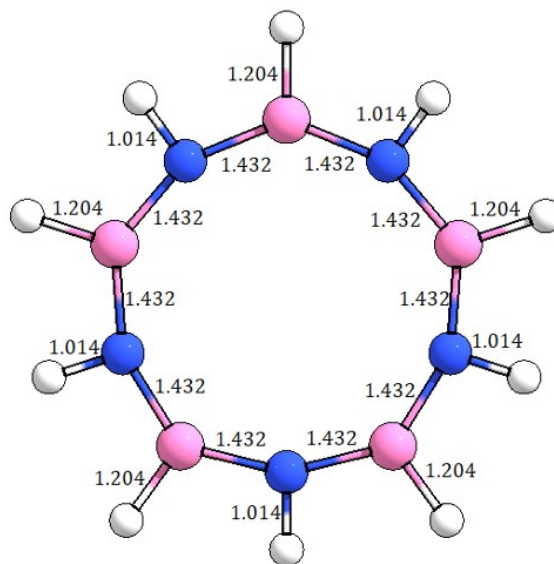

### $D_{5h}$ $B_5N_5H_{10}$ Cation Optimised

|   |             |             |            |
|---|-------------|-------------|------------|
| B | 2.04098143  | 1.48285981  | 0.00000000 |
| B | -0.77958553 | 2.39931757  | 0.00000000 |
| B | -2.52279179 | 0.00000000  | 0.00000000 |
| B | -0.77958553 | -2.39931757 | 0.00000000 |
| B | 2.04098143  | -1.48285981 | 0.00000000 |
| N | 2.33223963  | 0.00000000  | 0.00000000 |
| N | 0.72070168  | 2.21809169  | 0.00000000 |
| N | -1.88682149 | 1.37085606  | 0.00000000 |
| N | -1.88682149 | -1.37085606 | 0.00000000 |
| N | 0.72070168  | -2.21809169 | 0.00000000 |
| H | -1.14350639 | -3.51935078 | 0.00000000 |
| H | 2.99373859  | -2.17507840 | 0.00000000 |
| H | 3.38201797  | 0.00000000  | 0.00000000 |

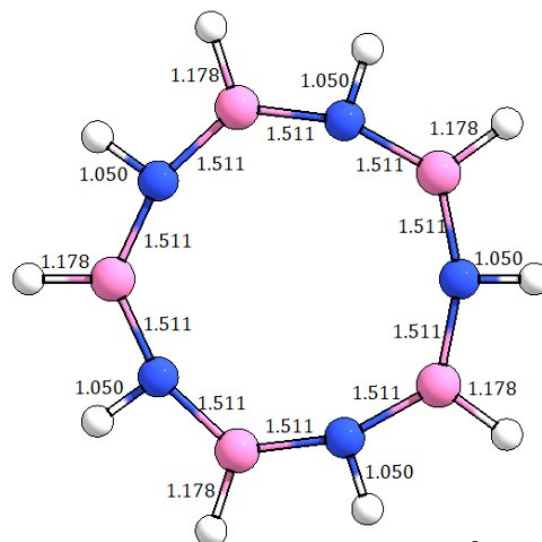

|   |             |             |            |
|---|-------------|-------------|------------|
| H | 2.99373859  | 2.17507840  | 0.00000000 |
| H | 1.04510103  | 3.21649023  | 0.00000000 |
| H | 1.04510103  | -3.21649023 | 0.00000000 |
| H | -1.14350639 | 3.51935078  | 0.00000000 |
| H | -2.73611002 | -1.98790029 | 0.00000000 |
| H | -2.73611002 | 1.98790029  | 0.00000000 |
| H | -3.70046440 | 0.00000000  | 0.00000000 |

Imaginary frequencies: 8927i cm<sup>-1</sup>, 8914i cm<sup>-1</sup>, 1057i cm<sup>-1</sup>, 1055i cm<sup>-1</sup>, 992.6i cm<sup>-1</sup>, 346.7i cm<sup>-1</sup>, 345.6i cm<sup>-1</sup>, 135.9i cm<sup>-1</sup>, 134.6i cm<sup>-1</sup>

### D<sub>5h</sub> B<sub>5</sub>N<sub>5</sub>H<sub>10</sub> Anion Optimised

|   |           |           |           |
|---|-----------|-----------|-----------|
| B | -1.457353 | -2.005875 | -0.000000 |
| B | 1.457353  | -2.005875 | -0.000000 |
| B | 2.358047  | 0.766176  | 0.000000  |
| B | -0.000000 | 2.479397  | 0.000000  |
| B | -2.358047 | 0.766176  | 0.000000  |
| N | -2.228529 | -0.724093 | 0.000000  |
| N | 0.000000  | -2.343214 | -0.000000 |
| N | 2.228529  | -0.724093 | -0.000000 |
| N | 1.377307  | 1.895700  | 0.000000  |
| N | -1.377307 | 1.895700  | 0.000000  |
| H | -0.000000 | 3.755105  | 0.000000  |
| H | -3.571317 | 1.160391  | 0.000000  |
| H | -3.197571 | -1.038954 | 0.000000  |
| H | -2.207195 | -3.037944 | -0.000000 |
| H | 0.000000  | -3.362125 | -0.000000 |
| H | -1.976207 | 2.720016  | 0.000000  |
| H | 2.207195  | -3.037944 | -0.000000 |
| H | 1.976207  | 2.720016  | 0.000000  |
| H | 3.197571  | -1.038954 | -0.000000 |
| H | 3.571317  | 1.160391  | 0.000000  |

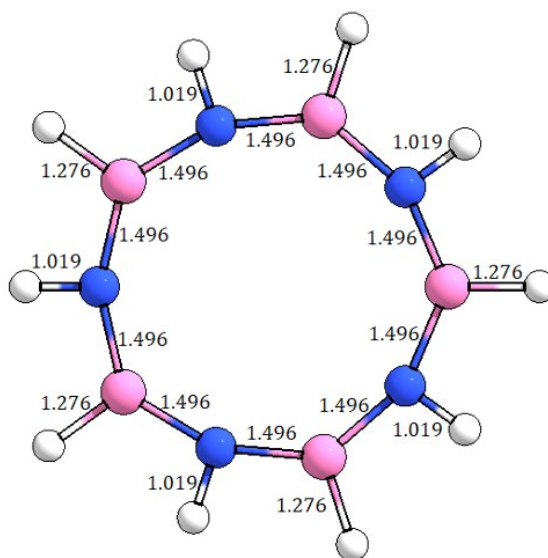

Imaginary frequencies: 575.6i cm<sup>-1</sup>, 575.4i cm<sup>-1</sup>, 480.0i cm<sup>-1</sup>, 480.0i cm<sup>-1</sup>, 399.1i cm<sup>-1</sup>

### D<sub>6h</sub> B<sub>6</sub>N<sub>6</sub>H<sub>12</sub> Neutral Optimised

|   |             |             |            |
|---|-------------|-------------|------------|
| N | 2.69643821  | 0.00000000  | 0.00000000 |
| N | 1.34821911  | 2.33518399  | 0.00000000 |
| N | -1.34821911 | 2.33518399  | 0.00000000 |
| N | -2.69643821 | 0.00000000  | 0.00000000 |
| N | -1.34821911 | -2.33518399 | 0.00000000 |
| N | 1.34821911  | -2.33518399 | 0.00000000 |
| B | 2.44932263  | -1.41411708 | 0.00000000 |
| B | 2.44932263  | 1.41411708  | 0.00000000 |
| B | 0.00000000  | 2.82823416  | 0.00000000 |
| B | -2.44932263 | 1.41411708  | 0.00000000 |
| B | -2.44932263 | -1.41411708 | 0.00000000 |
| B | 0.00000000  | -2.82823416 | 0.00000000 |
| H | -3.49454397 | -2.01757590 | 0.00000000 |
| H | -1.85548598 | -3.21379599 | 0.00000000 |
| H | 0.00000000  | -4.03515180 | 0.00000000 |
| H | 1.85548598  | -3.21379599 | 0.00000000 |

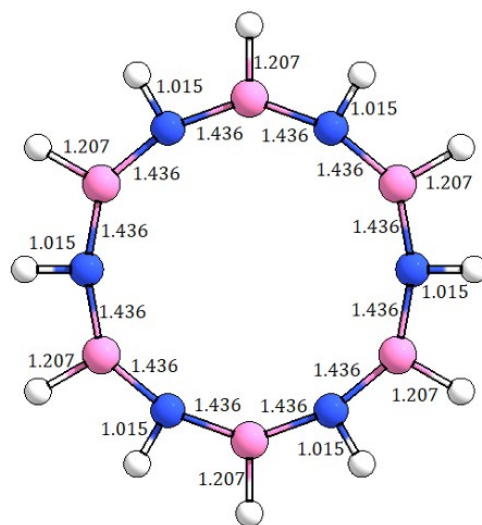

|   |             |             |            |
|---|-------------|-------------|------------|
| H | 3.49454397  | -2.01757590 | 0.00000000 |
| H | 3.71097197  | 0.00000000  | 0.00000000 |
| H | 3.49454397  | 2.01757590  | 0.00000000 |
| H | 1.85548598  | 3.21379599  | 0.00000000 |
| H | 0.00000000  | 4.03515180  | 0.00000000 |
| H | -1.85548598 | 3.21379599  | 0.00000000 |
| H | -3.49454397 | 2.01757590  | 0.00000000 |
| H | -3.71097197 | 0.00000000  | 0.00000000 |

Imaginary frequencies: 113.6i cm<sup>-1</sup>, 100.1i cm<sup>-1</sup>

### D<sub>6h</sub> B<sub>6</sub>N<sub>6</sub>H<sub>12</sub> Cation Optimised

|   |             |             |            |
|---|-------------|-------------|------------|
| N | 2.70272385  | 0.00000000  | 0.00000000 |
| N | 1.35136193  | 2.34062752  | 0.00000000 |
| N | -1.35136193 | 2.34062752  | 0.00000000 |
| N | -2.70272385 | 0.00000000  | 0.00000000 |
| N | -1.35136193 | -2.34062752 | 0.00000000 |
| N | 1.35136193  | -2.34062752 | 0.00000000 |
| B | 2.48930154  | -1.43719891 | 0.00000000 |
| B | 2.48930154  | 1.43719891  | 0.00000000 |
| B | 0.00000000  | 2.87439783  | 0.00000000 |
| B | -2.48930154 | 1.43719891  | 0.00000000 |
| B | -2.48930154 | -1.43719891 | 0.00000000 |
| B | 0.00000000  | -2.87439783 | 0.00000000 |
| H | -3.51656154 | -2.03028775 | 0.00000000 |
| H | -1.86423368 | -3.22894745 | 0.00000000 |
| H | 0.00000000  | -4.06057551 | 0.00000000 |
| H | 1.86423368  | -3.22894745 | 0.00000000 |
| H | 3.51656154  | -2.03028775 | 0.00000000 |
| H | 3.72846736  | 0.00000000  | 0.00000000 |
| H | 3.51656154  | 2.03028775  | 0.00000000 |
| H | 1.86423368  | 3.22894745  | 0.00000000 |
| H | 0.00000000  | 4.06057551  | 0.00000000 |
| H | -1.86423368 | 3.22894745  | 0.00000000 |
| H | -3.51656154 | 2.03028775  | 0.00000000 |
| H | -3.72846736 | 0.00000000  | 0.00000000 |

Imaginary frequencies: 392.5i cm<sup>-1</sup>, 390.1i cm<sup>-1</sup>, 348.4i cm<sup>-1</sup>, 3.44.6i cm<sup>-1</sup>, 272.2i cm<sup>-1</sup>, 173.0i cm<sup>-1</sup>, 111.6i cm<sup>-1</sup>, 110.3i cm<sup>-1</sup>

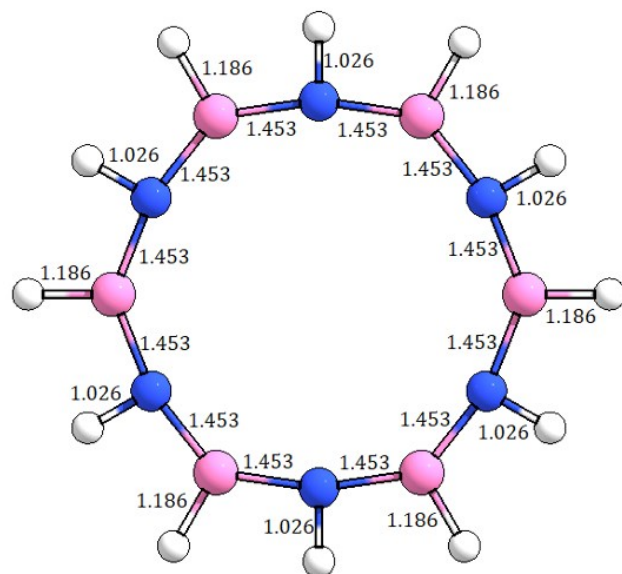

### D<sub>6h</sub> B<sub>6</sub>N<sub>6</sub>H<sub>12</sub> Anion Optimised

|   |             |             |            |
|---|-------------|-------------|------------|
| N | 2.71434705  | 0.00000000  | 0.00000000 |
| N | 1.35717353  | 2.35069350  | 0.00000000 |
| N | -1.35717353 | 2.35069350  | 0.00000000 |
| N | -2.71434705 | 0.00000000  | 0.00000000 |
| N | -1.35717353 | -2.35069350 | 0.00000000 |
| N | 1.35717353  | -2.35069350 | 0.00000000 |
| B | 2.47508520  | -1.42899111 | 0.00000000 |
| B | 2.47508520  | 1.42899111  | 0.00000000 |
| B | 0.00000000  | 2.85798221  | 0.00000000 |
| B | -2.47508520 | 1.42899111  | 0.00000000 |

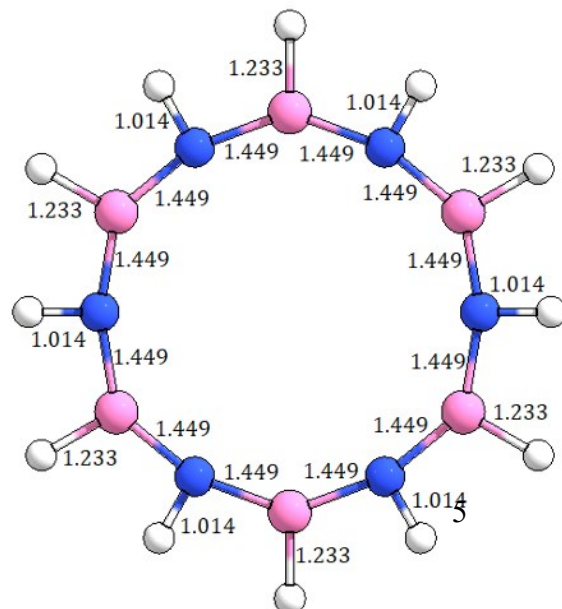

|   |             |             |            |
|---|-------------|-------------|------------|
| B | -2.47508520 | -1.42899111 | 0.00000000 |
| B | 0.00000000  | -2.85798221 | 0.00000000 |
| H | -3.54276640 | -2.04541713 | 0.00000000 |
| H | -1.86402237 | -3.22858145 | 0.00000000 |
| H | 0.00000000  | -4.09083427 | 0.00000000 |
| H | 1.86402237  | -3.22858145 | 0.00000000 |
| H | 3.54276640  | -2.04541713 | 0.00000000 |
| H | 3.72804474  | 0.00000000  | 0.00000000 |
| H | 3.54276640  | 2.04541713  | 0.00000000 |
| H | 1.86402237  | 3.22858145  | 0.00000000 |
| H | 0.00000000  | 4.09083427  | 0.00000000 |
| H | -1.86402237 | 3.22858145  | 0.00000000 |
| H | -3.54276640 | 2.04541713  | 0.00000000 |
| H | -3.72804474 | 0.00000000  | 0.00000000 |

Imaginary frequencies: 48.8i cm<sup>-1</sup>, 42.2i cm<sup>-1</sup>

### D<sub>7h</sub> B<sub>7</sub>N<sub>7</sub>H<sub>14</sub> Neutral Optimised

|   |           |           |           |
|---|-----------|-----------|-----------|
| N | 0.000000  | 3.140604  | -0.000000 |
| N | -2.455423 | 1.958134  | -0.000000 |
| N | -3.061862 | -0.698850 | -0.000000 |
| N | -1.362657 | -2.829586 | -0.000000 |
| N | 1.362657  | -2.829586 | 0.000000  |
| N | 3.061862  | -0.698850 | 0.000000  |
| N | 2.455423  | 1.958134  | 0.000000  |
| B | 1.428198  | 2.965685  | 0.000000  |
| B | -1.428198 | 2.965685  | -0.000000 |
| B | -3.209133 | 0.732464  | -0.000000 |
| B | -2.573525 | -2.052317 | -0.000000 |
| B | -0.000000 | -3.291662 | -0.000000 |
| B | 2.573525  | -2.052317 | 0.000000  |
| B | 3.209133  | 0.732464  | 0.000000  |
| H | 3.519071  | -2.806366 | 0.000000  |
| H | 4.050685  | -0.924542 | 0.000000  |
| H | 4.388210  | 1.001580  | 0.000000  |
| H | 3.248397  | 2.590510  | 0.000000  |
| H | 1.952937  | 4.055316  | 0.000000  |
| H | 0.000000  | 4.154856  | -0.000000 |
| H | -1.952937 | 4.055316  | -0.000000 |
| H | -3.248397 | 2.590510  | -0.000000 |
| H | -4.388210 | 1.001580  | -0.000000 |
| H | -4.050685 | -0.924542 | -0.000000 |
| H | -3.519071 | -2.806366 | -0.000000 |
| H | -1.802725 | -3.743396 | -0.000000 |
| H | -0.000000 | -4.501061 | -0.000000 |
| H | 1.802725  | -3.743396 | 0.000000  |

Imaginary frequencies: 159.7i cm<sup>-1</sup>, 159.7i cm<sup>-1</sup>, 99.15i cm<sup>-1</sup>, 99.14i cm<sup>-1</sup>, 98.82i cm<sup>-1</sup>, 98.82i cm<sup>-1</sup>,

### D<sub>7h</sub> B<sub>7</sub>N<sub>7</sub>H<sub>14</sub> Cation Optimised

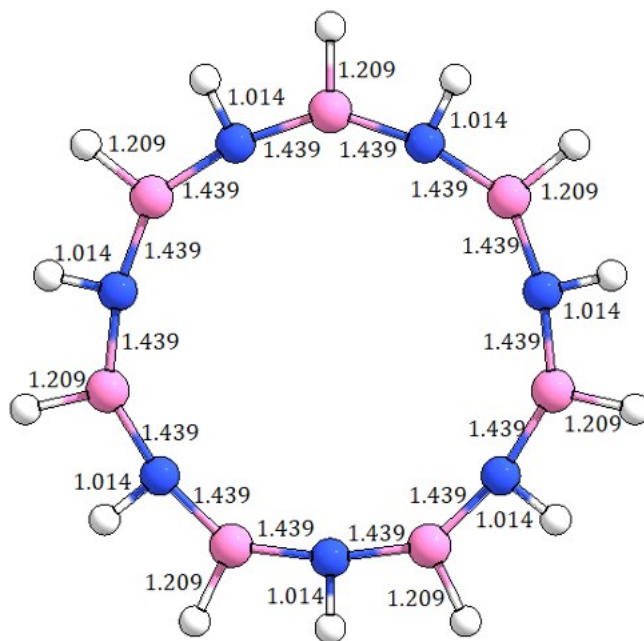

|   |           |           |           |
|---|-----------|-----------|-----------|
| N | 0.000000  | 3.213482  | -0.000000 |
| N | -2.512402 | 2.003573  | -0.000000 |
| N | -3.132914 | -0.715067 | -0.000000 |
| N | -1.394278 | -2.895248 | -0.000000 |
| N | 1.394278  | -2.895248 | 0.000000  |
| N | 3.132914  | -0.715067 | 0.000000  |
| N | 2.512402  | 2.003573  | 0.000000  |
| B | 1.482514  | 3.078472  | 0.000000  |
| B | -1.482514 | 3.078472  | -0.000000 |
| B | -3.331179 | 0.760320  | -0.000000 |
| B | -2.671398 | -2.130369 | -0.000000 |
| B | -0.000000 | -3.416846 | -0.000000 |
| B | 2.671398  | -2.130369 | 0.000000  |
| B | 3.331179  | 0.760320  | 0.000000  |
| H | 3.594223  | -2.866297 | 0.000000  |
| H | 4.144193  | -0.945885 | 0.000000  |
| H | 4.481922  | 1.022970  | 0.000000  |
| H | 3.323385  | 2.650311  | 0.000000  |
| H | 1.994643  | 4.141919  | 0.000000  |
| H | 0.000000  | 4.250768  | -0.000000 |
| H | -1.994643 | 4.141919  | -0.000000 |
| H | -3.323385 | 2.650311  | -0.000000 |
| H | -4.481922 | 1.022970  | -0.000000 |
| H | -4.144193 | -0.945885 | -0.000000 |
| H | -3.594223 | -2.866297 | -0.000000 |
| H | -1.844339 | -3.829810 | -0.000000 |
| H | -0.000000 | -4.597183 | -0.000000 |
| H | 1.844339  | -3.829810 | 0.000000  |

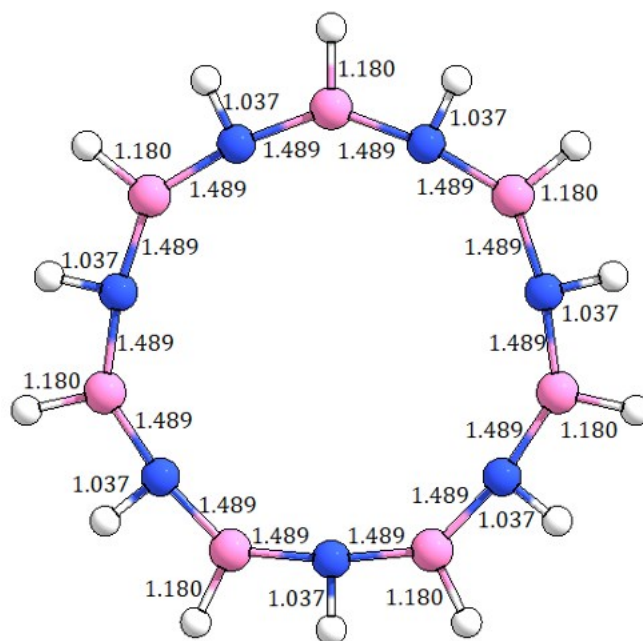

Imaginary frequencies: 1472i cm<sup>-1</sup>, 1472i cm<sup>-1</sup>, 1216 i cm<sup>-1</sup>, 1216i cm<sup>-1</sup>, 754.4i cm<sup>-1</sup>, 754.4i cm<sup>-1</sup>, 200.4i cm<sup>-1</sup>, 200.4i cm<sup>-1</sup>, 163.2i cm<sup>-1</sup>, 129.0i cm<sup>-1</sup>, 129.0i cm<sup>-1</sup>,

### D<sub>7h</sub> B<sub>7</sub>N<sub>7</sub>H<sub>14</sub> Anion Optimised

|   |           |           |           |
|---|-----------|-----------|-----------|
| N | 0.000000  | 3.220409  | -0.000000 |
| N | -2.517817 | 2.007892  | -0.000000 |
| N | -3.139666 | -0.716608 | -0.000000 |
| N | -1.397283 | -2.901488 | -0.000000 |
| N | 1.397283  | -2.901488 | 0.000000  |
| N | 3.139666  | -0.716608 | 0.000000  |
| N | 2.517817  | 2.007892  | 0.000000  |
| B | 1.467432  | 3.047154  | 0.000000  |
| B | -1.467432 | 3.047154  | -0.000000 |
| B | -3.297290 | 0.752585  | -0.000000 |
| B | -2.644221 | -2.108696 | -0.000000 |
| B | -0.000000 | -3.382085 | -0.000000 |
| B | 2.644221  | -2.108696 | 0.000000  |
| B | 3.297290  | 0.752585  | 0.000000  |
| H | 3.632318  | -2.896677 | 0.000000  |
| H | 4.128235  | -0.942243 | 0.000000  |
| H | 4.529427  | 1.033812  | 0.000000  |
| H | 3.310587  | 2.640105  | 0.000000  |

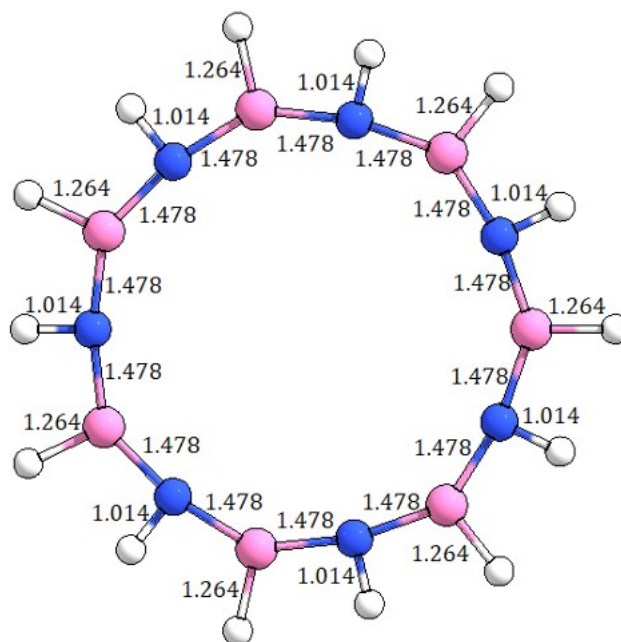

|   |           |           |           |
|---|-----------|-----------|-----------|
| H | 2.015784  | 4.185820  | 0.000000  |
| H | 0.000000  | 4.234400  | -0.000000 |
| H | -2.015784 | 4.185820  | -0.000000 |
| H | -3.310587 | 2.640105  | -0.000000 |
| H | -4.529427 | 1.033812  | -0.000000 |
| H | -4.128235 | -0.942243 | -0.000000 |
| H | -3.632318 | -2.896677 | -0.000000 |
| H | -1.837237 | -3.815063 | -0.000000 |
| H | -0.000000 | -4.645909 | -0.000000 |
| H | 1.837237  | -3.815063 | 0.000000  |

Imaginary frequencies: 20.84i cm<sup>-1</sup>, 20.84 i cm<sup>-1</sup>

### D<sub>4h</sub> (B<sub>4</sub>N<sub>4</sub>H<sub>8</sub>)<sub>2</sub>Ti Neutral Optimised

|    |              |              |              |
|----|--------------|--------------|--------------|
| 1  | 2.214075890  | 2.214075890  | 1.519332700  |
| 1  | 0.000000000  | 2.817793100  | 1.459995830  |
| 1  | -2.214075890 | 2.214075890  | 1.519332700  |
| 1  | 2.817793100  | 0.000000000  | 1.459995830  |
| 1  | 2.214075890  | -2.214075890 | 1.519332700  |
| 1  | -2.214075890 | -2.214075890 | 1.519332700  |
| 1  | 0.000000000  | -2.817793100 | 1.459995830  |
| 1  | -2.817793100 | 0.000000000  | 1.459995830  |
| 5  | 1.372658650  | 1.372658650  | 1.572875590  |
| 5  | -1.372658650 | 1.372658650  | 1.572875590  |
| 5  | -1.372658650 | -1.372658650 | 1.572875590  |
| 5  | 1.372658650  | -1.372658650 | 1.572875590  |
| 7  | 1.812573570  | 0.000000000  | 1.610736080  |
| 7  | 0.000000000  | 1.812573570  | 1.610736080  |
| 7  | -1.812573570 | 0.000000000  | 1.610736080  |
| 7  | 0.000000000  | -1.812573570 | 1.610736080  |
| 22 | 0.000000000  | 0.000000000  | 0.000000000  |
| 1  | 2.214075890  | 2.214075890  | -1.519332700 |
| 1  | 0.000000000  | 2.817793100  | -1.459995830 |
| 1  | -2.214075890 | 2.214075890  | -1.519332700 |
| 1  | 2.817793100  | 0.000000000  | -1.459995830 |
| 1  | 2.214075890  | -2.214075890 | -1.519332700 |
| 1  | -2.214075890 | -2.214075890 | -1.519332700 |
| 1  | 0.000000000  | -2.817793100 | -1.459995830 |
| 1  | -2.817793100 | 0.000000000  | -1.459995830 |
| 5  | 1.372658650  | 1.372658650  | -1.572875590 |
| 5  | -1.372658650 | 1.372658650  | -1.572875590 |
| 5  | -1.372658650 | -1.372658650 | -1.572875590 |
| 5  | 1.372658650  | -1.372658650 | -1.572875590 |
| 7  | 1.812573570  | 0.000000000  | -1.610736080 |
| 7  | 0.000000000  | 1.812573570  | -1.610736080 |
| 7  | -1.812573570 | 0.000000000  | -1.610736080 |
| 7  | 0.000000000  | -1.812573570 | -1.610736080 |
| 1  | 3.910257785  | 9.142071234  | 1.571545277  |
| 1  | 1.698292820  | 9.747968506  | 1.528447259  |
| 1  | -0.513667621 | 9.142065153  | 1.571428563  |
| 1  | 4.516104842  | 6.930945702  | 1.460133516  |

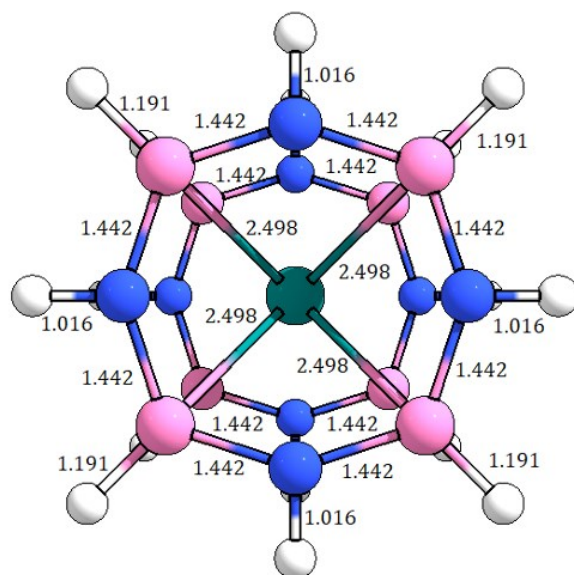



|    |              |             |              |
|----|--------------|-------------|--------------|
| 1  | 3.914479211  | 4.713912006 | 1.467535251  |
| 1  | -0.517881160 | 4.713905651 | 1.467334541  |
| 1  | 1.698302275  | 4.112388305 | 1.391924167  |
| 1  | -1.119497375 | 6.930942363 | 1.459958146  |
| 5  | 3.069115729  | 8.299010931 | 1.600888252  |
| 5  | 0.327473659  | 8.299007761 | 1.600830566  |
| 5  | 0.323797959  | 5.553696221 | 1.545048717  |
| 5  | 3.072794031  | 5.553703148 | 1.545146517  |
| 7  | 3.510878604  | 6.925798753 | 1.610821616  |
| 7  | 1.698292382  | 8.738858694 | 1.651900175  |
| 7  | -0.114286435 | 6.925792931 | 1.610748803  |
| 7  | 1.698295164  | 5.113735347 | 1.569824077  |
| 22 | 1.698298065  | 6.952344818 | -0.000000217 |
| 1  | 3.917792138  | 9.048015215 | -1.402501000 |
| 1  | 1.698268516  | 9.644330459 | -1.308445796 |
| 1  | -0.521260381 | 9.048027566 | -1.402487962 |
| 1  | 4.516057557  | 6.822956556 | -1.460111313 |
| 1  | 3.906891075  | 4.619862664 | -1.636374610 |
| 1  | -0.510356531 | 4.619875374 | -1.636482676 |
| 1  | 1.698255687  | 4.008743579 | -1.611796197 |
| 1  | -1.119538151 | 6.822957775 | -1.460108307 |
| 5  | 3.075593194  | 8.210434607 | -1.496808647 |
| 5  | 0.320934542  | 8.210443032 | -1.496797599 |
| 5  | 0.330282177  | 5.465133075 | -1.649178619 |
| 5  | 3.066255030  | 5.465118325 | -1.649130010 |
| 7  | 3.510836619  | 6.835302301 | -1.610835436 |
| 7  | 1.698262490  | 8.647617419 | -1.524126770 |
| 7  | -0.114312257 | 6.835313537 | -1.610800851 |
| 7  | 1.698266028  | 5.022477838 | -1.697529447 |

Mode 1: 54.69  $\text{cm}^{-1}$

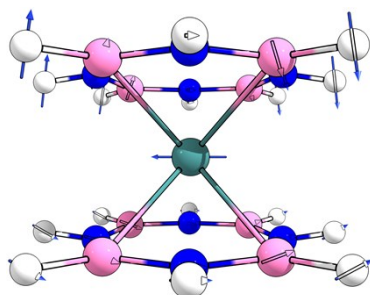

Mode 2: 86.87  $\text{cm}^{-1}$

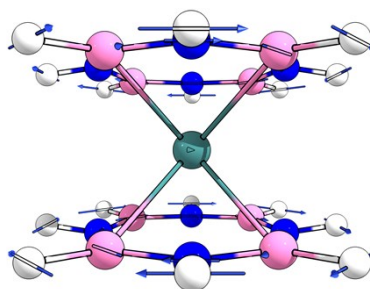

Mode 3: 127.6  $\text{cm}^{-1}$

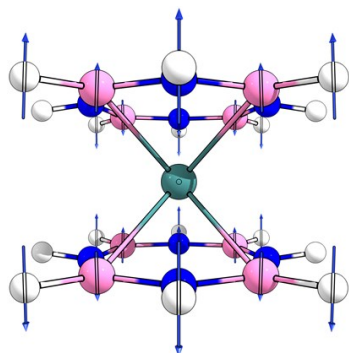

Mode 4: 159.1  $\text{cm}^{-1}$

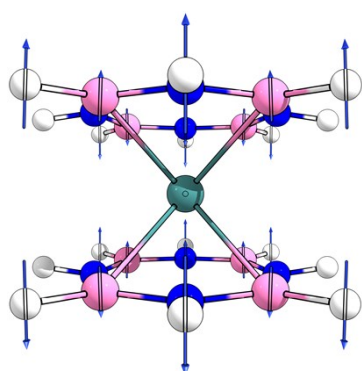

Mode 5: 176.1  $\text{cm}^{-1}$

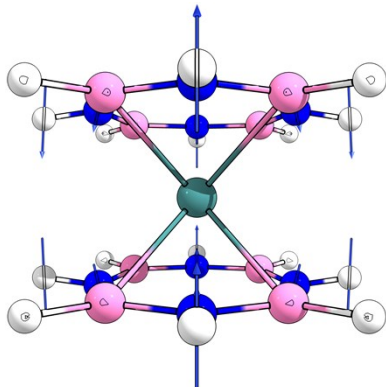

Mode 6: 176.5  $\text{cm}^{-1}$

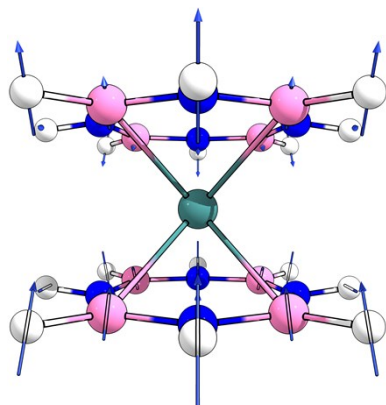

**D<sub>4h</sub> (B<sub>4</sub>N<sub>4</sub>H<sub>8</sub>)<sub>2</sub>Ti Neutral Optimised at wb97X-2/6-31G\*\* level of theory**

|    |             |             |             |
|----|-------------|-------------|-------------|
| H  | 2.21754768  | 2.21754768  | 1.53106902  |
| H  | 0.00000000  | 2.81865901  | 1.48466093  |
| H  | -2.21754768 | 2.21754768  | 1.53106902  |
| H  | 2.81865901  | 0.00000000  | 1.48466093  |
| H  | 2.21754768  | -2.21754768 | 1.53106902  |
| H  | -2.21754768 | -2.21754768 | 1.53106902  |
| H  | 0.00000000  | -2.81865901 | 1.48466093  |
| H  | -2.81865901 | 0.00000000  | 1.48466093  |
| B  | 1.36904752  | 1.36904752  | 1.59239279  |
| B  | -1.36904752 | 1.36904752  | 1.59239279  |
| B  | -1.36904752 | -1.36904752 | 1.59239279  |
| B  | 1.36904752  | -1.36904752 | 1.59239279  |
| N  | 1.81456970  | 0.00000000  | 1.63924512  |
| N  | 0.00000000  | 1.81456970  | 1.63924512  |
| N  | -1.81456970 | 0.00000000  | 1.63924512  |
| N  | 0.00000000  | -1.81456970 | 1.63924512  |
| Ti | 0.00000000  | 0.00000000  | 0.00000000  |
| H  | 2.21754768  | 2.21754768  | -1.53106902 |
| H  | 0.00000000  | 2.81865901  | -1.48466093 |
| H  | -2.21754768 | 2.21754768  | -1.53106902 |
| H  | 2.81865901  | 0.00000000  | -1.48466093 |
| H  | 2.21754768  | -2.21754768 | -1.53106902 |
| H  | -2.21754768 | -2.21754768 | -1.53106902 |
| H  | 0.00000000  | -2.81865901 | -1.48466093 |
| H  | -2.81865901 | 0.00000000  | -1.48466093 |
| B  | 1.36904752  | 1.36904752  | -1.59239279 |
| B  | -1.36904752 | 1.36904752  | -1.59239279 |
| B  | -1.36904752 | -1.36904752 | -1.59239279 |
| B  | 1.36904752  | -1.36904752 | -1.59239279 |
| N  | 1.81456970  | 0.00000000  | -1.63924512 |
| N  | 0.00000000  | 1.81456970  | -1.63924512 |
| N  | -1.81456970 | 0.00000000  | -1.63924512 |
| N  | 0.00000000  | -1.81456970 | -1.63924512 |

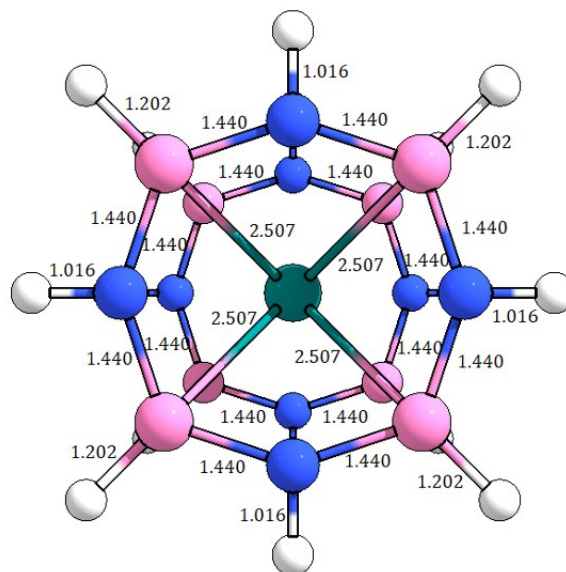

Mode 1: 59.35 cm<sup>-1</sup>

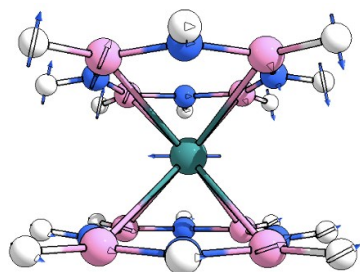

Mode 2: 109.03 cm<sup>-1</sup>

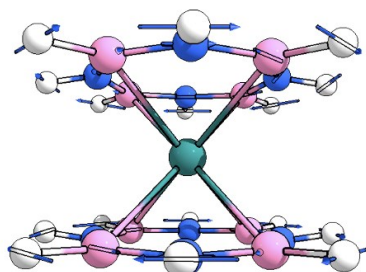

Mode 3: 121.53  $\text{cm}^{-1}$

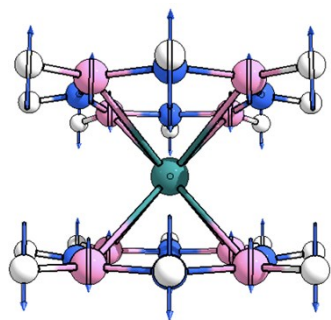

Mode 4: 140.02  $\text{cm}^{-1}$

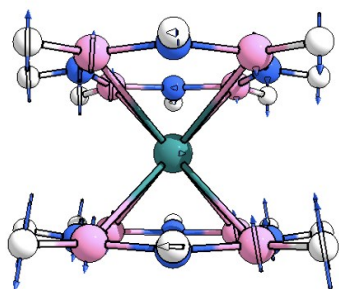

Mode 5: 175.52  $\text{cm}^{-1}$

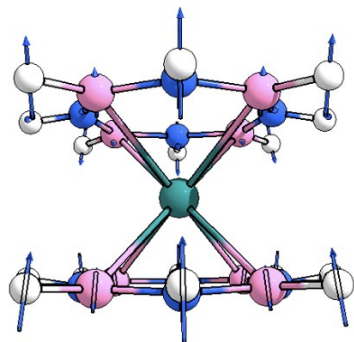

Mode 6: 180.6  $\text{cm}^{-1}$

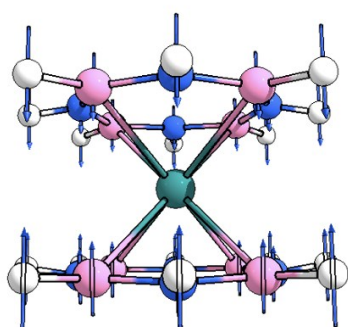

Supplement: d0cp02284e1.pdf [file d0cp02284e1.pdf]
